# Supplementary material
Source: MDPI journal article supplement (https://www.mdpi.com/2071-1050/14/22/15050)

Oneway

## Notes

|                        |                                |                                                                                                                        |
|------------------------|--------------------------------|------------------------------------------------------------------------------------------------------------------------|
| Output Created         |                                | 14-JUL-2022 10:14:35                                                                                                   |
| Comments               |                                |                                                                                                                        |
| Input                  | Data                           | C:\...\220714_dp_without outliers.sav                                                                                  |
|                        | Active Dataset                 | DataSet3                                                                                                               |
|                        | Filter                         | <none>                                                                                                                 |
|                        | Weight                         | <none>                                                                                                                 |
|                        | Split File                     | <none>                                                                                                                 |
|                        | N of Rows in Working Data File | 39                                                                                                                     |
| Missing Value Handling | Definition of Missing          | User-defined missing values are treated as missing.                                                                    |
|                        | Cases Used                     | Statistics for each analysis are based on cases with no missing data for any variable in the analysis.                 |
| Syntax                 |                                | ONEWAY<br>LogisticsEmissionsShare BY<br>ValueChain<br>/STATISTICS<br>DESCRIPTIVES<br>/PLOT MEANS<br>/MISSING ANALYSIS. |
| Resources              | Processor Time                 | 00:00:01.55                                                                                                            |
|                        | Elapsed Time                   | 00:00:01.17                                                                                                            |

## Descriptives

LogisticsEmissionsShare

|   |  |    |            |            | 95% Confidence Interval<br>for Mean |            |            |  |
|---|--|----|------------|------------|-------------------------------------|------------|------------|--|
|   |  |    | Std.       |            | Lower                               | Upper      |            |  |
|   |  | N  | Mean       | Deviation  | Std. Error                          | Bound      | Bound      |  |
| 1 |  | 13 | 0.09259948 | 0.02957018 | 0.00820129                          | 0.07473040 | 0.11046857 |  |
|   |  |    | 746        | 4231       | 3498                                | 397        | 095        |  |

|       |    |                   |                    |                    |                   |                   |  |  |
|-------|----|-------------------|--------------------|--------------------|-------------------|-------------------|--|--|
| 2     | 5  | 0.05315409<br>140 | 0.02193500<br>2500 | 0.00980963<br>1335 | 0.02591818<br>850 | 0.08038999<br>430 |  |  |
| 3     | 3  | 0.41292500<br>133 | 0.02408928<br>6753 | 0.01390795<br>6191 | 0.35308389<br>566 | 0.47276610<br>701 |  |  |
| 5     | 5  | 0.01320031<br>120 | 0.00806476<br>5343 | 0.00360667<br>2706 | 0.00318658<br>242 | 0.02321403<br>998 |  |  |
| 6     | 7  | 0.13286672<br>171 | 0.10380494<br>2765 | 0.03923458<br>0488 | 0.03686316<br>174 | 0.22887028<br>168 |  |  |
| 7     | 6  | 0.17225568<br>617 | 0.10188713<br>9583 | 0.04159525<br>0555 | 0.06533169<br>064 | 0.27917968<br>169 |  |  |
| Total | 39 | 0.12148568<br>008 | 0.11406377<br>5335 | 0.01826482<br>1760 | 0.08451048<br>150 | 0.15846087<br>865 |  |  |

## ANOVA

LogisticsEmissionsShare

|                | Sum of Squares | df | Mean Square | F       | Sig.  |
|----------------|----------------|----|-------------|---------|-------|
| Between Groups | 0.364          | 5  | 0.073       | 180.424 | 0.000 |
| Within Groups  | 0.130          | 33 | 0.004       |         |       |
| Total          | 0.494          | 38 |             |         |       |

Means Plots

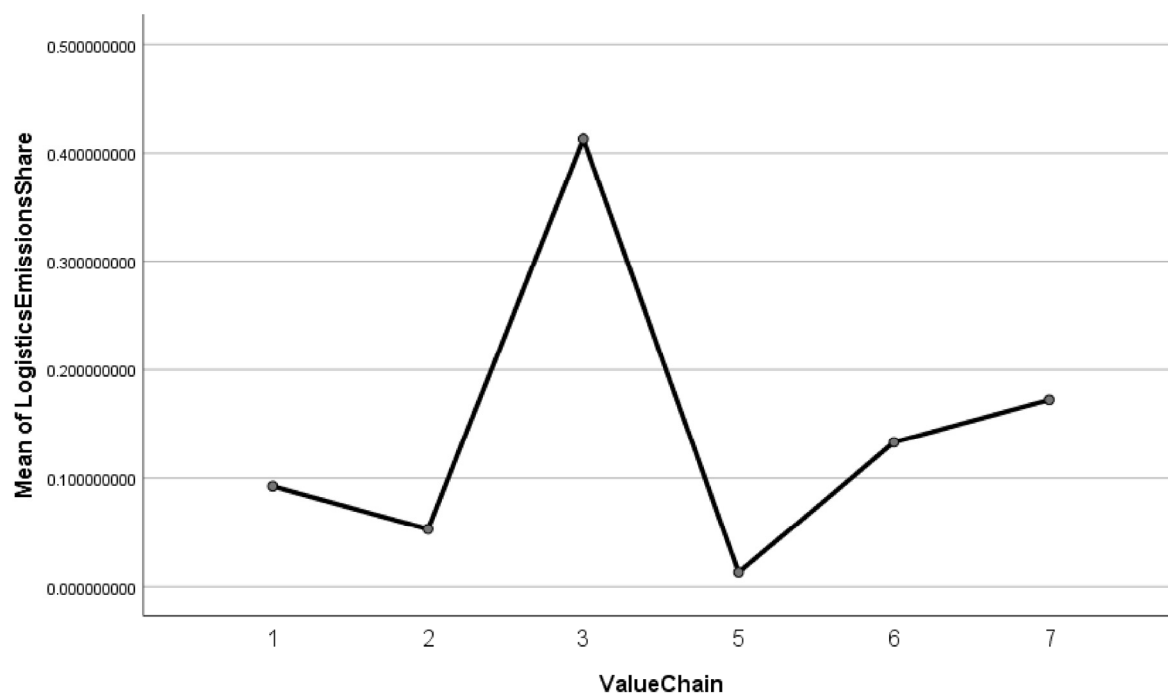

Supplement: s1 [file s1]
